# Supplementary material for: The Cone of Direct Gaze: A Stable Trait
Source: Front Psychol. 2021 Jun 29;12:682395. doi: 10.3389/fpsyg.2021.682395 (PMC8275972; doi:10.3389/fpsyg.2021.682395)
Supplement: Supplementary file 1 [file Table_1.XLSX]

## Sheet: Lobmaier_Data_Exp1
PartID	PartSex	PartAge	Session	CoDG	pse_left	pse_right	AQ	SPIN
1002	f	21	Baseline	6.61205	3.11315	3.4989	12	35
1003	f	22	Baseline	3.12254	1.70891	1.41363	14	53
1004	m	26	Baseline	4.64526	2.68079	1.96447
1006	m	20	Baseline	5.74486	2.83201	2.91285	7	24
1008	f	21	Baseline	4.39773	2.31188	2.08584	4	25
1009	f	20	Baseline	3.35802	1.36241	1.99561	6	27
1010	m	23	Baseline	5.21553	2.4984	2.71713	4	32
1011	m	21	Baseline	7.7497	3.87512	3.87458	9	28
1012	m	21	Baseline	3.70088	2.73983	0.961045	6	34
1013	m	24	Baseline	3.6102	1.99081	1.61939	3	27
2014	m	22	Baseline	6.56993	2.56993	4	7	29
2015	f	22	Baseline	4.78221	2.24766	2.53455	8	27
2016	f	18	Baseline	6.52606	4.25126	2.2748	5	21
2017	f	21	Baseline	11.2154	5.83085	5.38457	8	31
2018	m	22	Baseline	8.90023	5.15373	3.74649	4	37
2019	f	19	Baseline	4.70356	1.92042	2.78313	4	51
2020	m	20	Baseline	7.63196	4.12599	3.50597	10	36
2021	m	37	Baseline	5.48726	2.82985	2.65741	21	32
2022	f	18	Baseline	4.61447	2.3736	2.24087	13	19
2023	m	58	Baseline	4.46833	2.09645	2.37188	16	41
2024	f	58	Baseline	6.24286	3.87401	2.36885	11	25
3025	f	20	Baseline	1.74306	1.64378	0.0992805	3	29
3027	f	20	Baseline	6.86914	3.62362	3.24552	10	29
3028	f	20	Baseline	4.83604	2.3589	2.47714	6	36
3029	f	20	Baseline	4.62336	2.46955	2.15381	5	46
3031	m	20	Baseline	5.45239	2.35198	3.10041	9	51
3032	m	20	Baseline	6.1045	3.21637	2.88813	5	31
3033	m	20	Baseline	5.21089	2.9757	2.23519	14	29
3034	f	21	Baseline	4.56568	2.36814	2.19754	13	44
3036	f	22	Baseline	3.74085	2.63037	1.11048	1	17
4037	f	22	Baseline	4.85417	2.62617	2.228	3	31
4038	f	24	Baseline	7.98642	4.12567	3.86074	7	35
4039	f	53	Baseline	3.58684	2.37188	1.21496	7	30
4040	f	27	Baseline	6.45625	3.87433	2.58192	14	46
4041	m	51	Baseline	8.99492	4.72218	4.27274	6	40
4042	m	21	Baseline	4.60778	2.63287	1.9749	4	40
4043	m	19	Baseline	2.81762	1.45063	1.36699	11	37
4044	m	20	Baseline	2.276	1.23183	1.04417	2	22
4046	m	24	Baseline	3.35141	1.51892	1.83249	7	63
4047	f	22	Baseline	7.23537	3.61683	3.61854	7	26
5049	f	22	Baseline	4.1065	2.20461	1.90189	8	40
5050	f	22	Baseline	4.14127	2.84613	1.29515	3	30
5051	f	21	Baseline	4.6202	2.37188	2.24832	11	32
5052	f	23	Baseline	7.227	4.00067	3.22633	1	32
5053	f	22	Baseline	5.11925	3.24552	1.87373	4	33
5054	f	24	Baseline	4.89694	1.90189	2.99506	5	30
5055	f	21	Baseline	3.51501	1.75606	1.75895	4	46
5056	f	25	Baseline	5.61343	3.74956	1.86387	5	35
5057	f	23	Baseline	4.50414	2.62617	1.87797	7	30
5058	f	19	Baseline	4.85203	1.50269	3.34934	4	40
5059	f	20	Baseline	5.80506	2.62907	3.17599	4	31
5060	f	20	Baseline	1.95472	1.3173	0.637417	3	28
1002	f	21	5min	4.93737	2.73983	2.19754	12	35
1003	f	22	5min	2.2286	1.23183	0.996775	14	53
1004	m	26	5min	3.40849	1.88143	1.52706
1006	m	20	5min	5.73078	3.10041	2.63037	7	24
1008	f	21	5min	2.31214	1.32914	0.983001	4	25
1009	f	20	5min	2.86926	1.45063	1.41863	6	27
1010	m	23	5min	3.84705	1.49507	2.35198	4	32
1011	m	21	5min	5.74803	2.99707	2.75096	9	28
1012	m	21	5min	4.07802	2.41473	1.66329	6	34
1013	m	24	5min	3.09328	1.4606	1.63268	3	27
2014	m	22	5min	6.62119	3.12173	3.49946	7	29
2015	f	22	5min	3.36001	1.99561	1.3644	8	27
2016	f	18	5min	7.65664	4.78363	2.87301	5	21
2017	f	21	5min	13.0243	7.72159	5.30266	8	31
2018	m	22	5min	7.11744	3.61854	3.4989	4	37
2019	f	19	5min	4.09699	1.52706	2.56993	4	51
2020	m	20	5min	8.63746	5.02256	3.6149	10	36
2021	m	37	5min	4.65791	2.04381	2.6141	21	32
2022	f	18	5min	3.9292	2.07347	1.85572	13	19
2023	m	58	5min	3.34034	1.62456	1.71578	16	41
2024	f	58	5min	5.11673	3.12112	1.99561	11	25
3025	f	20	5min	2.42037	1.61641	0.803967	3	29
3027	f	20	5min	6.0273	3.48737	2.53994	10	29
3028	f	20	5min	5.11215	2.62319	2.48896	6	36
3029	f	20	5min	4.2483	2.00742	2.24087	5	46
3031	m	20	5min	3.39414	1.74429	1.64985	9	51
3032	m	20	5min	6.11335	3.23794	2.87541	5	31
3033	m	20	5min	4.2185	2.2436	1.9749	14	29
3034	f	21	5min	2.40481	0.917337	1.48748	13	44
3036	f	22	5min	3.30606	1.93079	1.37527	1	17
4037	f	22	5min	3.24289	1.11952	2.12337	3	31
4038	f	24	5min	4.20041	2.49951	1.7009	7	35
4039	f	53	5min	2.20974	1.61187	0.597873	7	30
4040	f	27	5min	4.84262	3.10519	1.73744	14	46
4041	m	51	5min	6.4377	3.74649	2.69121	6	40
4042	m	21	5min	4.24917	2.62461	1.62456	4	40
4043	m	19	5min	2.35062	0.965518	1.3851	11	37
4044	m	20	5min	0.950902	0.215897	0.735005	2	22
4046	m	24	5min	3.24455	1.61187	1.63268	7	63
4047	f	22	5min	6.8641	3.36712	3.49699	7	26
5049	f	22	5min	1.64055	1.19235	0.448197	8	40
5050	f	22	5min	5.8347	4	1.8347	3	30
5051	f	21	5min	3.98933	1.74429	2.24505	11	32
5052	f	23	5min	6.98455	3.87512	3.10944	1	32
5053	f	22	5min	6.62236	3.62399	2.99838	4	33
5054	f	24	5min	5.46567	2.62617	2.8395	5	30
5055	f	21	5min	2.39511	1.50195	0.893157	4	46
5056	f	25	5min	3.82767	2.46083	1.36685	5	35
5057	f	23	5min	3.37369	1.87373	1.49995	7	30
5058	f	19	5min	4.8894	2.24505	2.64436	4	40
5059	f	20	5min	4.0606	1.61939	2.44121	4	31
5060	f	20	5min	1.82977	1.19235	0.637417	3	28
1002	f	21	1week	7.36842	3.61854	3.74988	12	35
1003	f	22	1week	1.97243	0.852906	1.11952	14	53
1004	m	26	1week	3.55621	1.80015	1.75606
1006	m	20	1week	5.20218	3.11633	2.08584	7	24
1008	f	21	1week	0.945307	0.210302	0.735005	4	25
1009	f	20	1week	3.37012	1.63268	1.73744	6	27
1010	m	23	1week	3.99802	1.62456	2.37346	4	32
1011	m	21	1week	3.8479	1.98403	1.86387	9	28
1012	m	21	1week	2.08391	1.25989	0.824013	6	34
1013	m	24	1week	2.983	2	0.983001	3	27
2014	m	22	1week	6.1258	2.49951	3.62629	7	29
2015	f	22	1week	1.89165	0.891649	1	8	27
2016	f	18	1week	6.99282	3.86899	3.12383	5	21
2017	f	21	1week	10.7085	6.45666	4.25188	8	31
2018	m	22	1week	6.72514	3.49881	3.22633	4	37
2019	f	19	1week	4.28065	2.5	1.78065	4	51
2020	m	20	1week	11.3751	6.47552	4.89959	10	36
2021	m	37	1week	3.98843	0.995994	2.99243	21	32
2022	f	18	1week	4.37367	1.87373	2.49994	13	19
2023	m	58	1week	4.05464	1.94929	2.10535	16	41
2024	f	58	1week	6.49882	3.87563	2.62319	11	25
3025	f	20	1week	3.83313	2.89558	0.937554	3	29
3027	f	20	1week	6.99684	3.12616	3.87067	10	29
3028	f	20	1week	5.11381	1.49891	3.6149	6	36
3029	f	20	1week	4.76112	3.06022	1.7009	5	46
3031	m	20	1week	4.69593	2.19754	2.4984	9	51
3032	m	20	1week	6.4932	3.74297	2.75023	5	31
3033	m	20	1week	3.6444	2.02501	1.61939	14	29
3034	f	21	1week	1.32877	0.852906	0.475867	13	44
3036	f	22	1week	5.92732	3.21359	2.71373	1	17
4037	f	22	1week	3.60131	1.86387	1.73744	3	31
4038	f	24	1week	2.65841	1.72798	0.930424	7	35
4039	f	53	1week	1.69082	1.21496	0.475867	7	30
4040	f	27	1week	3.57767	2.33496	1.24271	14	46
4041	m	51	1week	5.958	3.10041	2.8576	6	40
4042	m	21	1week	3.35766	1.99081	1.36685	4	40
4043	m	19	1week	2.19534	0.734748	1.4606	11	37
4044	m	20	1week	2.05998	0.667724	1.39226	2	22
4046	m	24	1week	3.34034	1.71578	1.62456	7	63
4047	f	22	1week	5.99692	2.3736	3.62333	7	26
5049	f	22	1week	1.58774	0.950323	0.637417	8	40
5050	f	22	1week	4.29665	2.83201	1.46464	3	30
5051	f	21	1week	4.49507	1.49507	3	11	32
5052	f	23	1week	7.10339	3.87401	3.22939	1	32
5053	f	22	1week	4.98361	2.48361	2.5	4	33
5054	f	24	1week	4.96794	2.4984	2.46955	5	30
5055	f	21	1week	2.69924	0.735005	1.96423	4	46
5056	f	25	1week	4.03445	2.12164	1.91281	5	35
5057	f	23	1week	2.58682	1.08791	1.49891	7	30
5058	f	19	1week	6.45871	2.99243	3.46627	4	40
5059	f	20	1week	6.01095	1.87797	4.13298	4	31
5060	f	20	1week	1.50741	1.40496	0.102458	3	28

## Sheet: Lobmaier_Data_Exp2
PartID	PartSex	PartAge	Session	CoDG	pse_left	pse_right	AQ	SPIN
1001	f	21	Baseline	6.98182	3.37398	3.60784	8	51
1002	f	20	Baseline	5.0158	2.61543	2.40038	12	41
1003	f	21	Baseline	3.85543	1.73744	2.118	3	37
1004	m	20	Baseline	5.71875	2.54536	3.17338	6	34
1005	f	21	Baseline	5.25738	2.63419	2.62319	6	38
1006	m	22	Baseline	3.71852	1.63268	2.08584	7	42
1007	m	21	Baseline	5.16861	2.9537	2.21491	10	34
1008	f	20	Baseline	5.37231	2.62617	2.74614	13	42
1009	m	20	Baseline	8.55873	3.87458	4.68415	8	31
1010	f	21	Baseline	2.17072	1.0512	1.11952	8	42
1011	m	21	Baseline	3.70994	1.9749	1.73504	6	32
1012	m	22	Baseline	7.04305	3.67113	3.37192	9	31
2013	m	26	Baseline	7.88707	4.27024	3.61683	17	57
2014	f	26	Baseline	5.75485	2.8766	2.87825	4	23
2015	m	25	Baseline	3.32476	1.73744	1.58733	11	31
2016	f	20	Baseline	4.57259	2.58856	1.98403	4	49
2018	m	24	Baseline	9.83988	5.71128	4.1286	10	24
2019	m	30	Baseline	4.42946	1.7558	2.67366	10	31
2021	f	25	Baseline	3.23061	1.47598	1.75463	11	65
2022	f	33	Baseline	5.84519	3.12112	2.72408	2	24
2024	f	24	Baseline	4.44167	1.84526	2.59641	10	53
3025	f	25	Baseline	4.85616	2.4827	2.37346	9	48
3027	f	27	Baseline	8.90331	4.77842	4.12488	4	39
3028	f	33	Baseline	7.48642	3.73992	3.74649	5	29
3029	f	53	Baseline	6.95614	3.21069	3.74544	2	31
3030	m	53	Baseline	4.72623	2.75096	1.97527	1	26
3031	m	27	Baseline	6.22067	2.46955	3.75113	0	29
3032	f	54	Baseline	5.31116	2.63037	2.68079	2	22
3033	f	25	Baseline	4.95896	3.08919	1.86976	5	27
3034	m	23	Baseline	6.24766	4	2.24766	4	26
3035	m	24	Baseline	6.37926	1.37777	5.0015	10	25
3036	m	24	Baseline	4.16123	2.00742	2.15381	14	47
4037	f	50	Baseline	6.28773	3.15065	3.13708	7	52
4038	f	52	Baseline	6.87325	4	2.87325	3	29
4039	f	23	Baseline	3.60204	1.36685	2.23519	7	43
4040	f	23	Baseline	5.90417	2.92897	2.97521	7	44
4041	m	23	Baseline	9.97185	5.38457	4.58728	3	32
4042	m	24	Baseline	4.37352	1.88356	2.48997	3	38
4043	m	19	Baseline	3.87437	2.33103	1.54334	9	40
4044	m	19	Baseline	6.24379	3.74428	2.49951	4	33
4045	m	20	Baseline	5.21836	3.24344	1.97493	4	25
4046	f	22	Baseline	3.35615	1.74429	1.61187	3	26
4047	f	20	Baseline	5.26383	2.44005	2.82378	4	32
4048	m	22	Baseline	2.13695	1.20392	0.93303	9	22
5049	m	20	Baseline	4.55216	2.81473	1.73744	5	44
5050	m	21	Baseline	6.23061	3.36845	2.86216	3	29
5051	f	20	Baseline	6.67259	4.28773	2.38486	6	38
5052	m	21	Baseline	10.6757	5.06057	5.61514	9	49
5053	m	21	Baseline	7.10027	3.37851	3.72176	4	22
5054	m	21	Baseline	7.21351	3.54162	3.67189	15	32
5055	f	20	Baseline	2.43227	0.831058	1.60121	8	35
5057	f	20	Baseline	3.92235	2.59641	1.32594	2	46
5058	f	22	Baseline	6.37256	2.87444	3.49812	5	33
5059	f	20	Baseline	4.99489	2.87325	2.12164	9	42
5060	f	20	Baseline	6.54882	3.74874	2.80008	8	38
1001	f	21	1week	6.11759	2.36885	3.74874	8	51
1002	f	20	1week	4.84678	3.10249	1.74429	12	41
1003	f	21	1week	4.11789	1.74429	2.3736	3	37
1004	m	20	1week	4.42476	1.80015	2.62461	6	34
1005	f	21	1week	5.8754	2.87541	3	6	38
1006	m	22	1week	2.99141	1.36685	1.62456	7	42
1007	m	21	1week	7.20137	3.74988	3.45149	10	34
1008	f	20	1week	4.49846	1.99852	2.49994	13	42
1009	m	20	1week	8.83436	4.50188	4.33248	8	31
1010	f	21	1week	2.13727	1.02418	1.11309	8	42
1011	m	21	1week	1.72912	1.13125	0.597873	6	32
1012	m	22	1week	7.62529	3.37449	4.2508	9	31
2013	m	26	1week	7.75788	4.13784	3.62004	17	57
2014	f	26	1week	4.04116	2.35964	1.68152	4	23
2015	m	25	1week	2.94929	1.94929	1	11	31
2016	f	20	1week	3.79875	2.19754	1.60121	4	49
2018	m	24	1week	10.0325	5.35564	4.67688	10	24
2019	m	30	1week	2.87825	1.21496	1.66329	10	31
2021	f	25	1week	3.65242	1.66161	1.99081	11	65
2022	f	33	1week	6.59968	4.13013	2.46955	2	24
2024	f	24	1week	3.87251	1.74914	2.12337	10	53
3025	f	25	1week	3.52393	1.49891	2.02502	9	48
3027	f	27	1week	8.5011	4	4.5011	4	39
3028	f	33	1week	6.61789	3.4989	3.11899	5	29
3029	f	53	1week	9.78523	5.26982	4.51541	2	31
3030	m	53	1week	4.94745	2.94745	2	1	26
3031	m	27	1week	4.61609	1.37057	3.24552	0	29
3032	f	54	1week	5.58658	3.10944	2.47714	2	22
3033	f	25	1week	3.94612	2.33426	1.61187	5	27
3034	m	23	1week	5.8662	3.25702	2.60918	4	26
3035	m	24	1week	10.5111	6.51108	4	10	25
3036	m	24	1week	6.35198	4	2.35198	14	47
4037	f	50	1week	5.22716	2.74614	2.48102	7	52
4038	f	52	1week	6.7379	3.23794	3.49996	3	29
4039	f	23	1week	3.52393	1.49891	2.02502	7	43
4040	f	23	1week	6.36154	3.11315	3.24838	7	44
4041	m	23	1week	8.44841	4.83351	3.6149	3	32
4042	m	24	1week	5.07966	2.49994	2.57973	3	38
4043	m	19	1week	3.68502	2.2436	1.44142	9	40
4044	m	19	1week	8.65508	5.41144	3.24363	4	33
4045	m	20	1week	4.37216	2.87325	1.49891	4	25
4046	f	22	1week	3.31986	1.94929	1.37057	3	26
4047	f	20	1week	5.82309	3.49206	2.33103	4	32
4048	m	22	1week	2.19083	1.18815	1.00268	9	22
5049	m	20	1week	3.74451	2.2436	1.50091	5	44
5050	m	21	1week	6.49583	3.87478	2.62106	3	29
5051	f	20	1week	5.746	2.74614	2.99986	6	38
5052	m	21	1week	9.2693	5.01918	4.25012	9	49
5053	m	21	1week	4.81154	2.614	2.19754	4	22
5054	m	21	1week	4.70618	2.62685	2.07933	15	32
5055	f	20	1week	1.84548	0.735005	1.11048	8	35
5057	f	20	1week	2.71715	1.3644	1.35275	2	46
5058	f	22	1week	3.8538	1.86976	1.98403	5	33
5059	f	20	1week	4.49555	2.49994	1.99561	9	42
5060	f	20	1week	5.74333	3.37398	2.36935	8	38

## Sheet: Notes and Explanations
PartID	Participant Identification Number. Note: Participants of Exp 1 were different from Participants of Exp. 2
PartSex	Participant sex: f = female, m = male
PartAge	Age of Participant
Session	Baseline, after 5 minutes, or after 1 week
CoDG	Width of the Cone of Direct Gaze in angular degrees
pse_left	Point of subjective equality, left hemisphere
pse_right	Point of subjective equality, right hemisphere
AQ	Autism Quotient
SPIN	SPIN score (social anxiety)
